## CORRECTION

# Correction: Scientific quality of COVID-19 and SARS CoV-2 publications in the highest impact medical journals during the early phase of the pandemic: A case control study

Marko Zdravkovic, Joana Berger-Estilita, Bogdan Zdravkovic, David Berger

In the Results subsection of the Abstract, there is an error in the second sentence. The correct sentence is: The 155 COVID-19 publications were 18-fold more likely to be of lower evidence (95% confidence interval [CI] for odds ratio, 7.0–47;  $P < 0.001$ ).

In the Results subsection of the Abstract, there is also an error in the fourth sentence. The correct sentence is: There was a significant difference in the early citation rate of the original articles that favored the COVID-19 original articles (median [interquartile range], 149 [79–512] vs. 3 [1.3–7] citations;  $P < 0.001$ ).

## Reference

1. Zdravkovic M, Berger-Estilita J, Zdravkovic B, Berger D (2020) Scientific quality of COVID-19 and SARS CoV-2 publications in the highest impact medical journals during the early phase of the pandemic: A case control study. PLOS ONE 15(11): e0241826. <https://doi.org/10.1371/journal.pone.0241826> PMID: 33152034

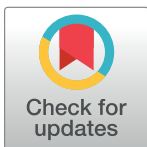

## OPEN ACCESS

**Citation:** Zdravkovic M, Berger-Estilita J, Zdravkovic B, Berger D (2021) Correction: Scientific quality of COVID-19 and SARS CoV-2 publications in the highest impact medical journals during the early phase of the pandemic: A case control study. PLOS ONE 16(4): e0250141. <https://doi.org/10.1371/journal.pone.0250141>

**Published:** April 8, 2021

**Copyright:** © 2021 Zdravkovic et al. This is an open access article distributed under the terms of the [Creative Commons Attribution License](https://creativecommons.org/licenses/by/4.0/), which permits unrestricted use, distribution, and reproduction in any medium, provided the original author and source are credited.
